# Supplementary material for: Nature of hydride and halide encapsulation in Ag8 cages: insights from the structure and interaction energy of [Ag8(X){S2P(OiPr)2}6]+ (X = H−, F−, Cl−, Br−, I−) from relativistic DFT calculations
Source: Royal Society of Chemistry journal article supplement (doi:10.1039/d1cp04249a), 2021-11-23
Supplement: d1cp04249a1.pdf [file d1cp04249a1.pdf]

--Supporting Information for: --

## Nature of Hydride and Halide Encapsulation in Ag<sub>8</sub> Cages. Insights from Structural and Interaction Energy [Ag<sub>8</sub>(X){S<sub>2</sub>P(O<sup>i</sup>Pr)<sub>2</sub>]<sub>6</sub>]<sup>+</sup> (X=H, F, Cl, Br, I) from Relativistic DFT Calculations

Raul Guajardo Maturana,<sup>a</sup> Alexandre O. Ortolan,<sup>b</sup> Peter. L. Rodríguez-Kessler,<sup>c</sup>  
Giovanni F. Caramori,<sup>b</sup> Renato L. T. Parreira<sup>d</sup> and Alvaro Muñoz-Castro<sup>c\*</sup>

<sup>a</sup>Universidad SEK, Facultad de Ciencias de la Salud, Instituto de Investigación Interdisciplinar en  
Ciencias Biomédicas SEK (I3CBSEK) Chile, Fernando Manterola 0789, Providencia, Santiago, Chile

<sup>b</sup>Departamento de Química, Universidade Federal de Santa Catarina, Campus Universitário Trindade,  
CP 476, Florianópolis, SC, 88040-900, Brazil.

<sup>c</sup>Laboratorio de Química Inorgánica y Materiales Moleculares, Facultad de Ingeniería, Universidad  
Autónoma de Chile, Llano Subercaceaux 2801, San Miguel, Santiago, Chile.

<sup>d</sup>Núcleo de Pesquisa em Ciências Exatas e Tecnológicas, Universidade de Franca, Franca, SP, 14404-  
600, Brazil.

### Content:

**Figure S1.** Comparison between  $\Delta E_{\text{int}}$  in the formation of [Ag<sub>8</sub>(X){S<sub>2</sub>P(OPr)<sub>2</sub>]<sub>6</sub>]<sup>+</sup> (X<sup>-</sup> = H, **1**, F, **2**, Cl, **3**, Br, **4**, and, I, **5**) and the ionic radii for H<sup>-</sup>, F<sup>-</sup>, Cl<sup>-</sup>, Br<sup>-</sup>, and I<sup>-</sup>. Page 2

**Table S1.** Energy decomposition analysis for the [Ag<sub>8</sub>{S<sub>2</sub>P(OPr)<sub>2</sub>]<sub>6</sub>]<sup>2+</sup>-X<sup>-</sup> interaction, values in kcal·mol<sup>-1</sup>, at the non-relativistic BP86-D3 level of theory. Page 2

**Table S2.** Energy decomposition analysis for the [Ag<sub>8</sub>{S<sub>2</sub>P(OPr)<sub>2</sub>]<sub>6</sub>]<sup>2+</sup>-X<sup>-</sup> interaction, values in kcal·mol<sup>-1</sup>, at the relativistic BP86-D3 level of theory. Page 2

**Table S3.** Energy decomposition analysis for the [Ag<sub>8</sub>{S<sub>2</sub>P(OPr)<sub>2</sub>]<sub>6</sub>]<sup>2+</sup>-X<sup>-</sup> interaction, values in kcal·mol<sup>-1</sup>, at the relativistic Hybrid B3LYP-D3 level of theory. Page 3

**Table S4.** Energy decomposition analysis for the [Ag<sub>8</sub>{S<sub>2</sub>P(OPr)<sub>2</sub>]<sub>6</sub>]<sup>2+</sup>-X<sup>-</sup> interaction, values in kcal·mol<sup>-1</sup>, at the relativistic Hybrid PBE0-D3 level of theory. Page 3

**Table S5.** Energy decomposition analysis for the [Ag<sub>8</sub>{S<sub>2</sub>P(OPr)<sub>2</sub>]<sub>6</sub>]<sup>2+</sup>-X<sup>-</sup> interaction, values in kcal·mol<sup>-1</sup>, at the relativistic Meta-Hybrid M06-2X level of theory. Page 3

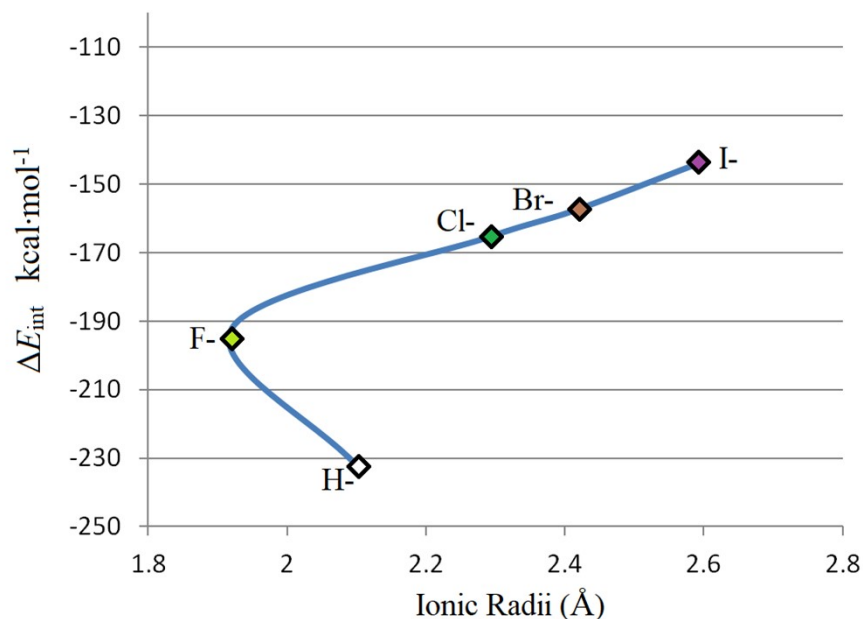

**Figure S1.** Comparison between  $\Delta E_{\text{int}}$  in the formation of  $[\text{Ag}_8(\text{X})\{\text{S}_2\text{P}(\text{OPr})_2\}_6]^+$  ( $\text{X}^- = \text{H}$ , **1**,  $\text{F}^-$ , **2**,  $\text{Cl}^-$ , **3**,  $\text{Br}^-$ , **4**, and,  $\text{I}^-$ , **5**) and the ionic radii for  $\text{H}^-$ ,  $\text{F}^-$ ,  $\text{Cl}^-$ ,  $\text{Br}^-$ , and  $\text{I}^-$ , as obtained from reference: Atomic and Ionic Radii of Elements 1–96, M. Rahm, R. Hoffmann, N. W. Ashcroft, *Chem. Eur. J.*, **2016**, *22*, 14625-14632.

**Table S1.** Energy decomposition analysis for the  $[\text{Ag}_8\{\text{S}_2\text{P}(\text{OPr})_2\}_6]^{2+}\text{-X}^-$  interaction, values in  $\text{kcal}\cdot\text{mol}^{-1}$ , at the **non-relativistic** BP86-D3 level of theory.

|                            | <b>1</b> |       | <b>2</b> |       | <b>3</b> |       | <b>4</b> |       | <b>5</b> |       |
|----------------------------|----------|-------|----------|-------|----------|-------|----------|-------|----------|-------|
| X=                         | H        |       | F        |       | Cl       |       | Br       |       | I        |       |
| $\Delta E_{\text{Pauli}}$  | 421.2    |       | 74.2     |       | 155.0    |       | 211.0    |       | 281.7    |       |
| $\Delta E_{\text{elstat}}$ | -564.4   | 86.5% | -202.4   | 73.6% | -267.4   | 82.0% | -316.4   | 84.9% | -370.9   | 87.1% |
| $\Delta E_{\text{orb}}$    | -85.9    | 13.2% | -69.1    | 25.1% | -51.0    | 15.6% | -46.6    | 12.5% | -43.8    | 10.3% |
| $\Delta E_{\text{disp}}$   | -2.0     | 0.3%  | -3.5     | 1.3%  | -7.8     | 2.4%  | -9.6     | 2.6%  | -11.3    | 2.6%  |
| $\Delta E_{\text{int}}$    | -231.0   |       | -200.8   |       | -171.4   |       | -161.7   |       | -144.2   |       |
| i-d%                       | 91.0%    |       | 84.4%    |       | 77.0%    |       | 72.7%    |       | 68.4%    |       |

**Table S2.** Energy decomposition analysis for the  $[\text{Ag}_8\{\text{S}_2\text{P}(\text{OPr})_2\}_6]^{2+}\text{-X}^-$  interaction, values in  $\text{kcal}\cdot\text{mol}^{-1}$ , at the **relativistic** BP86-D3 level of theory as given at the main article, repeated here for easy comparison.

|                            | <b>1</b> |                    | <b>2</b> |       | <b>3</b> |                    | <b>4</b> |                    | <b>5</b> |                    |
|----------------------------|----------|--------------------|----------|-------|----------|--------------------|----------|--------------------|----------|--------------------|
| X=                         | H        |                    | F        |       | Cl       |                    | Br       |                    | I        |                    |
| $\Delta E_{\text{Pauli}}$  | 427.2    |                    | 75.2     |       | 157.2    |                    | 213.9    |                    | 276.0    |                    |
| $\Delta E_{\text{elstat}}$ | -556.7   | 84.4% <sup>a</sup> | -190.6   | 71.3% | -257.5   | 79.8% <sup>a</sup> | -308.9   | 83.1% <sup>a</sup> | -357.5   | 85.1% <sup>a</sup> |
| $\Delta E_{\text{orb}}$    | -100.7   | 15.3% <sup>a</sup> | -73.2    | 27.4% | -57.3    | 17.8% <sup>a</sup> | -53.4    | 14.4% <sup>a</sup> | -51.5    | 12.3% <sup>a</sup> |
| $\Delta E_{\text{disp}}$   | -2.0     | 0.3% <sup>a</sup>  | -3.5     | 1.3%  | -7.8     | 2.4% <sup>a</sup>  | -9.6     | 2.6% <sup>a</sup>  | -11.3    | 2.7% <sup>a</sup>  |
| $\Delta E_{\text{int}}$    | -232.2   |                    | -192.1   |       | -165.5   |                    | -158.0   |                    | -144.2   |                    |
| i-d%                       | 90.7%    |                    | 84.2%    |       | 76.6%    |                    | 72.2%    |                    | 68.6%    |                    |

**Table S3.** Energy decomposition analysis for the  $[\text{Ag}_8\{\text{S}_2\text{P}(\text{OPr})_2\}_6]^{2+}\text{-X}^-$  interaction, values in  $\text{kcal}\cdot\text{mol}^{-1}$ , at the relativistic Hybrid **B3LYP-D3** level of theory.

|                            | <b>1</b> |       | <b>2</b> |       | <b>3</b> |       | <b>4</b> |       | <b>5</b> |       |
|----------------------------|----------|-------|----------|-------|----------|-------|----------|-------|----------|-------|
| X=                         | H        |       | F        |       | Cl       |       | Br       |       | I        |       |
| $\Delta E_{\text{Pauli}}$  | 439.5    |       | 81.8     |       | 175.6    |       | 238.1    |       | 310.3    |       |
| $\Delta E_{\text{elstat}}$ | -571.6   | 85.5% | -199.8   | 73.6% | -268.6   | 79.7% | -321.7   | 82.5% | -375.7   | 84.2% |
| $\Delta E_{\text{orb}}$    | -93.6    | 14.0% | -65.2    | 24.0% | -53.6    | 15.9% | -49.5    | 12.7% | -47.5    | 10.6% |
| $\Delta E_{\text{disp}}$   | -3.0     | 0.5%  | -6.3     | 2.3%  | -14.9    | 4.4%  | -18.9    | 4.9%  | -22.8    | 5.1%  |
| $\Delta E_{\text{int}}$    | -228.7   |       | -189.5   |       | -161.5   |       | -152.1   |       | -135.7   |       |
| i-d%                       | 90.9%    |       | 85.1%    |       | 77.2%    |       | 72.5%    |       | 68.5%    |       |

**Table S4.** Energy decomposition analysis for the  $[\text{Ag}_8\{\text{S}_2\text{P}(\text{OPr})_2\}_6]^{2+}\text{-X}^-$  interaction, values in  $\text{kcal}\cdot\text{mol}^{-1}$ , at the relativistic Hybrid **PBE0-D3** level of theory.

|                            | <b>1</b> |       | <b>2</b> |       | <b>3</b> |       | <b>4</b> |       | <b>5</b> |        |
|----------------------------|----------|-------|----------|-------|----------|-------|----------|-------|----------|--------|
| X=                         | H        |       | F        |       | Cl       |       | Br       |       | I        |        |
| $\Delta E_{\text{Pauli}}$  | 428.9    |       | 72.4     |       | 151.4    |       | 203.3    |       | 278.8    | 428.9  |
| $\Delta E_{\text{elstat}}$ | -571.8   | 85.7% | -199.5   | 73.4% | -262.8   | 81.1% | -309.4   | 83.8% | -364.0   | -571.8 |
| $\Delta E_{\text{orb}}$    | -93.7    | 14.0% | -65.1    | 23.9% | -53.2    | 16.4% | -50.3    | 13.6% | -48.2    | -93.7  |
| $\Delta E_{\text{disp}}$   | -2.0     | 0.3%  | -7.4     | 2.7%  | -7.8     | 2.4%  | -9.6     | 2.6%  | -11.3    | -2.0   |
| $\Delta E_{\text{int}}$    | -238.6   |       | -199.6   |       | -172.4   |       | -166.0   |       | -144.7   |        |
| i-d%                       | 90.6%    |       | 84.9%    |       | 77.1%    |       | 72.3%    |       | 69.2%    |        |

**Table S5.** Energy decomposition analysis for the  $[\text{Ag}_8\{\text{S}_2\text{P}(\text{OPr})_2\}_6]^{2+}\text{-X}^-$  interaction, values in  $\text{kcal}\cdot\text{mol}^{-1}$ , at the relativistic Meta-Hybrid **M06-2X** level of theory.

|                            | <b>1</b> |       | <b>2</b> |       | <b>3</b> |       | <b>4</b> |       | <b>5</b> |        |
|----------------------------|----------|-------|----------|-------|----------|-------|----------|-------|----------|--------|
| X=                         | H        |       | F        |       | Cl       |       | Br       |       | I        |        |
| $\Delta E_{\text{Pauli}}$  | 432.9    |       | 183.1    |       | 159.0    |       | 213.5    |       | 263.7    | 183.1  |
| $\Delta E_{\text{elstat}}$ | -570.4   | 89.2% | -312.7   | 87.4% | -266.2   | 85.0% | -313.3   | 84.6% | -353.0   | -312.7 |
| $\Delta E_{\text{orb}}$    | -69.0    | 10.8% | -45.2    | 12.6% | -47.0    | 15.0% | -57.1    | 15.4% | -43.9    | -45.2  |
| $\Delta E_{\text{int}}$    | -208.4   |       | -174.7   |       | -154.1   |       | -156.9   |       | -133.2   | -174.7 |
| i-d%                       | 92.4%    |       | 91.2%    |       | 78.6%    |       | 73.4%    |       | 69.4%    |        |
